# Supplementary material for: A Combination of Structural, Genetic, Phenotypic and Enzymatic Analyses Reveals the Importance of a Predicted Fucosyltransferase to Protein O-Glycosylation in the Bacteroidetes
Source: MDPI journal article supplement (doi:10.3390/biom11121795), 2021-11-30
Supplement: s1 [file s1]

## Supplementary Materials

# A Combination of Structural, Genetic, Phenotypic and Enzymatic Analyses Reveals the Importance of a Predicted Fucosyltransferase to Protein O-Glycosylation in the Bacteroidetes

Markus B. Tomek <sup>1,†</sup>, Bettina Janesch <sup>1,†</sup>, Matthias L. Braun <sup>1,†</sup>, Manfred Taschner <sup>1</sup>, Rudolf Figl <sup>2</sup>, Clemens Grünwald-Gruber <sup>2</sup>, Michael J. Coyne <sup>3</sup>, Markus Blaukopf <sup>4</sup>, Friedrich Altmann <sup>2</sup>, Paul Kosma <sup>4</sup>, Hanspeter Kählig <sup>5</sup>, Laurie E. Comstock <sup>3</sup> and Christina Schäffer <sup>1,\*</sup>

<sup>1</sup> NanoGlycobiology Unit, Institute of Biologically Inspired Materials, Department of NanoBiotechnology, Universität für Bodenkultur Wien, Muthgasse 11, A-1190 Vienna, Austria; markus.tomek@boku.ac.at (M.B.T.); bettina.janesch@gmx.at (B.J.); math.b@gmx.at (M.L.B.); taschner@lifetaq.com (M.T.)

<sup>2</sup> Institute of Biochemistry, Department of Chemistry, Universität für Bodenkultur Wien, Muthgasse 18, A-1190 Vienna, Austria; rudolf.figl@boku.ac.at (R.F.); clemens.gruber@boku.ac.at (C.G.-G.); friedrich.altmann@boku.ac.at (F.A.)

<sup>3</sup> Department of Microbiology and the Duchossois Family Institute, University of Chicago, KCB, 900 E. 57th Street, Chicago, IL 60637, USA; mcoyne@uchicago.edu (M.J.C.); lecomstock@uchicago.edu (L.E.C.)

<sup>4</sup> Institute of Organic Chemistry, Department of Chemistry, Universität für Bodenkultur Wien, Muthgasse 18, A-1190 Vienna, Austria; markus.blaukopf@boku.ac.at (M.B.); paul.kosma@boku.ac.at (P.K.)

<sup>5</sup> Department of Organic Chemistry, Faculty of Chemistry, University of Vienna, Währinger Strasse 38, A-1090 Vienna, Austria; hanspeter.kaehlig@univie.ac.at

\* Correspondence: christina.schaeffer@boku.ac.at; Tel.: +43-1-47654-80203

† These authors contributed equally to this work.

## Supplementary Methods

### Preparation of pNP- $\alpha$ -D-Gal-Fuc As a Fucosidase Substrate

For an indirect determination of the L-Fuc-Gal linkage in the *T. forsythia* O-glycan structure, the pNP- $\alpha$ -L-Gal-Fuc product obtained from the in vitro rTanf\_01305 reaction was used. For that purpose, the reaction mixture was layered onto a preparative glass-backed TLC plate (TLC Silica gel 60 G F254 glass plates, Merck Millipore) and allowed to dry completely. The TLC plate was developed using an ACN:H<sub>2</sub>O (17:2) solvent mixture. Once dry, the product band of interest was carefully scraped off with a spatula and transferred into a 1.5-mL reaction tube. The silica was washed twice with 100  $\mu$ L of ACN:H<sub>2</sub>O (17:2) and the supernatants were collected. Remaining silica was removed by centrifugation (16,000 $\times$  g, 5 min, 22 °C) and samples were dried at 70 °C. Purity was checked on a TLC plate; the washing process was repeated until no residual pNP-Gal was visible.

The following fucosidases were tested for activity on pNP- $\alpha$ -L-Gal-Fuc:  $\alpha$ 1,2 fucosidase (catalyses the hydrolysis of linear  $\alpha$ 1,2-linked Fuc),  $\alpha$ 1,3/4 fucosidase (catalysis the hydrolysis of terminal, non-reducing  $\alpha$ 1,3 and  $\alpha$ 1,4-linked Fuc) and  $\alpha$ 1,2/4/6 fucosidase O (catalyses the hydrolysis of terminal  $\alpha$ 1,2,  $\alpha$ 1,4 and  $\alpha$ 1,6-linked Fuc with the highest efficiency on  $\alpha$ 1,6 linked Fuc residues) (all from New England Biolabs) as well as rTfFuc1 (a *T. forsythia*  $\alpha$ 1,2 fucosidase with additional  $\alpha$ 1,6 specificity on small unbranched substrates) [42].

The pNP- $\alpha$ -D-Gal-Fuc product was resuspended in 20  $\mu$ L of ultrapure water (Milli-Q). Standard assay conditions were performed in 10  $\mu$ L at 37 °C for 2 h were: 4  $\mu$ L of pNP- $\alpha$ -D-Gal Fuc, 2  $\mu$ L of fucosidase, 1 $\times$  GlycoBuffer 1 (New England Biolabs), supplemented with 100  $\mu$ g/mL BSA. For the rTfFuc1, 4  $\mu$ L (approximately 1.6  $\mu$ g) was used for hydrolysis. TLC was carried out on silica plates as described above.

## Supplementary Table

Table S1. Primers used in this study.

| Primer name                   | Primer Sequence (5'–3')                                    |
|-------------------------------|------------------------------------------------------------|
| 516                           | gtacGAATTCATGAGTCCGCTGTTTAGCATTATTAC                       |
| 517                           | gtacAAGCTTTTAATAGTTGTTGCCAAACAG                            |
| JB_172                        | aatcaGAATTCATGACAGCAGCCAAACCCACC                           |
| JB_173                        | aatcaGGATCCTTAATCGTTGGTTTTTCCGTGC                          |
| JB_174                        | aatcaGAATTCATGCATAGCCATCCCAGTCC                            |
| JB_175                        | aatcaAAGCTTTCAGAAGGGTGCATCGGAAG                            |
| <b>Cross-complementations</b> |                                                            |
| 48 <sup>a</sup>               | GTCAGATAGGCCTAATGACTGGC                                    |
| 490 <sup>b</sup>              | GGGATATCGTATTGACCGGCATCCTC                                 |
| 494 <sup>b</sup>              | CAGCCTAAGTGGTTCGGCAAGTTC                                   |
| 495 <sup>b</sup>              | CATCGTTTCGGGCCCTTGCACGATAAGC                               |
| JB_6                          | GAATTTGGGACTGGGATGGCTATGCATATATTATGACAATAGACTGTGATATAATG   |
| JB_7                          | CAGTCTATTGTCATAATATATGCATAGCCATCCCAGTCCCAAATTC             |
| JB_10                         | CTTACATTATAATGTCGATTCAATTATAAAAGCCAGTCATTAG                |
| JB_11                         | GGCCTAATGACTGGCTTTTATAATGAATCGACATTATAATGTAAG              |
| JB_13                         | ACGGATAAGGTGGGTTTGGCTGCTGTCATATATTATGACAATAGACTGTGATATAATG |
| JB_14                         | CAGTCTATTGTCATAATATATGACAGCAGCCAAACCCACCTTATCC             |
| JB_19                         | gctaGAGCTCATCGTAATGCGAGCTGGCTCCGTAG                        |
| JB_23                         | GAGCTCgtacGGTACCTCAGAAGGGTGCATCGGAAGGAGTAGC                |
| JB_24                         | gctaGGTACCATGAACTTTAATAAAATTGATTTAGAC                      |
| JB_25                         | GAGCTCtgacGGTACCTTAATCGTTGGTTTTTCCGTGCCTG                  |
| Phep_4048_F                   | aaccGGATCCCCAGACAATATACAGACCTCTACCAA                       |
| Phep_4048_R                   | ccttGGATCCAAAAATTTAATCGTTGGTTTTTCC                         |
| Tanf_01305_F                  | gatcGGATCCGTCTATTGTCATAATATATGTCTCCTTTGTTTTCC              |
| Tanf_01305_R                  | aagctGGATCCCTAATAATTGTTCCCGAAAAGCTTCGCC                    |

## GDP-L-Fuc synthase knock-out

460 ATGACAAAAAAGAAATTGCCCGTTCGTTTTAC  
461 CTACGAAGGATGAAATTTTTCAGGGACAAC  
486 **CGAACGGGCAATTTCTTTTTTGT**CATGAGTAGCGTTCAGTTTTCAGTATTG  
487 ATACGGGACGGATCGAGCATTTG  
488 GTCCGTTCTCAATCTTCACATCAG  
489 **GTCCCTGAAAAATTTCA**T**CCTTCGTAG**CTCTCCCATCGTTCGGAGCTCCTG  
524 GTAAACGAACGGGCAATTTCTTTTTTGT**CAT**  
525 CCCTGAAAAATTTCA**T**C**TTCGTAG**  
532 CCGCTGTCTGCTTGGAAGACG  
533 CGAAACGCACATGTTTCCTACCC  
534 GTCGGCCATTTGGAGCAACC  
535 TGAAGGGTCGAAGGCAAGTG

---

Nucleotides used for overlap-extension PCRs are written in bold, artificial restriction sites are underscored. Lowercase letters indicate artificially introduced bases to improve restriction enzyme digestion.<sup>a</sup> [31] <sup>b</sup> [10].

## Supplementary Figures

**A***T. forsythia* ATCC 43037 wild-type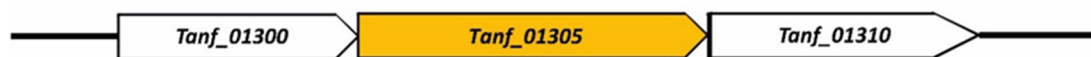*T. forsythia*  $\Delta$ Tanf\_01305 *ermF*<sup>R</sup> (Tomek et al. 2018)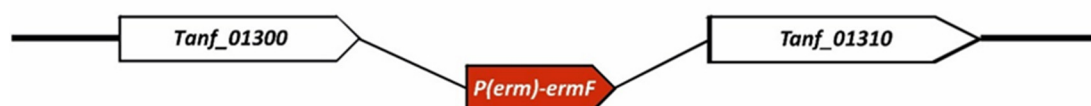*T. forsythia*  $\Delta$ Tanf\_01305<sup>+BF4306</sup> *cat*<sup>R</sup>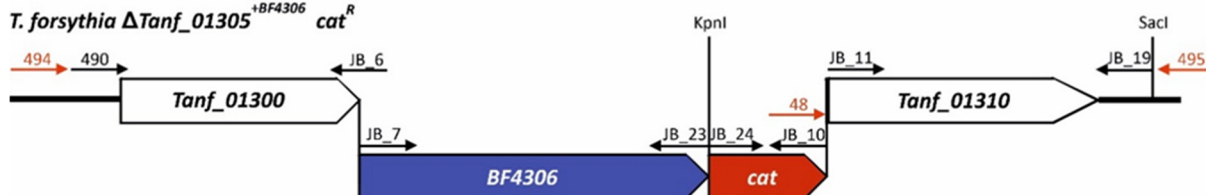*T. forsythia*  $\Delta$ Tanf\_01305<sup>+Phep\_4048</sup> *cat*<sup>R</sup>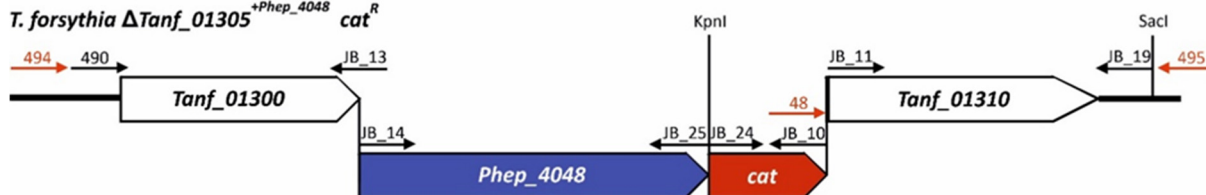**B**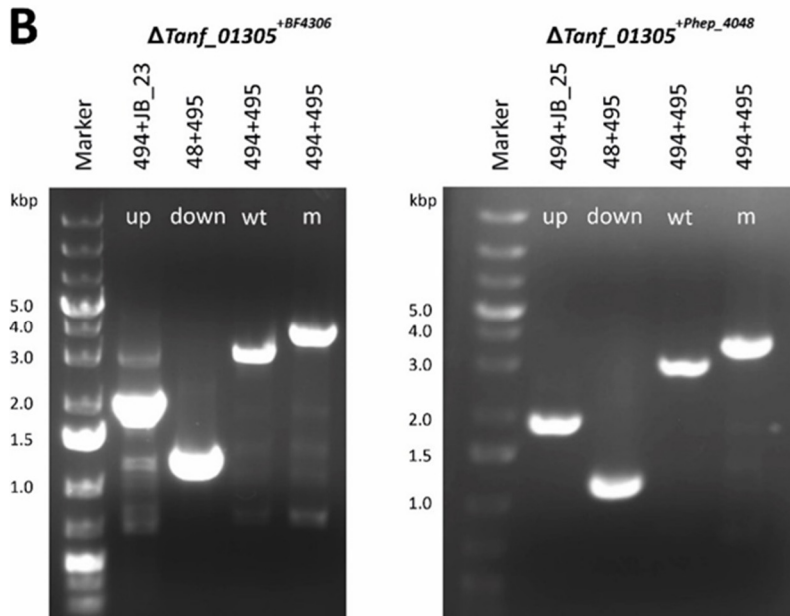

**Figure S1.** Strategy for cross-complementation of a *T. forsythia*  $\Delta$ Tanf\_01305 knock-out mutant with the homologous genes BF4306 from *B. fragilis* and Phep\_4048 from *P. heparinus*, respectively, and confirmation by screening PCR. (A) The genomic organization of the Tanf\_01305 locus is shown for the parent strain *T. forsythia* ATCC 43037, the  $\Delta$ Tanf\_01305 mutant [10] and the cross-complemented mutants  $\Delta$ Tanf\_01305<sup>+BF4306</sup> and  $\Delta$ Tanf\_01305<sup>+Phep\_4048</sup>. Black coloured arrows represent primers used for PCR amplification of genes and homologous regions, red coloured primers represent those used to screen for correct integration of the cross-complementation cassettes; restriction sites used for cloning are indicated (not drawn to scale). (B) Agarose gel electrophoresis (left) confirms the successful integration of BF4306 at the Tanf\_01305 locus using the screening primers 494/JB\_23 (1888 bp) and 48/495 (1141 bp) when using genomic DNA of the  $\Delta$ Tanf\_01305<sup>+BF4306</sup> strain. Screening primers 494/495 yield in a

3649-bp PCR product from genomic DNA of the cross-complemented mutant  $\Delta Tanf\_01305^{+BF4306}$ , whereas the same primer pair results in a 3023-bp product from genomic DNA of the *T. forsythia* wild-type. The successful integration of *Phep\_4048* at the *Tanf\_01305* locus was likewise confirmed using the screening primers 494/JB\_25 (1867 bp) and 48/495 (1137 bp) when using genomic DNA of the  $\Delta Tanf\_01305^{+Phep4048}$  strain (right). Screening primers 494/495 yield in a 3630-bp PCR product from genomic DNA of the cross-complemented mutant  $\Delta Tanf\_01305^{+Phep\_4048}$ , whereas the same primer pair results in a 3023-bp product from genomic DNA of the *T. forsythia* wild-type. O'Gene Ruler 1 kb Plus DNA Ladder (Thermo Fisher Scientific) was used as a gene ladder.

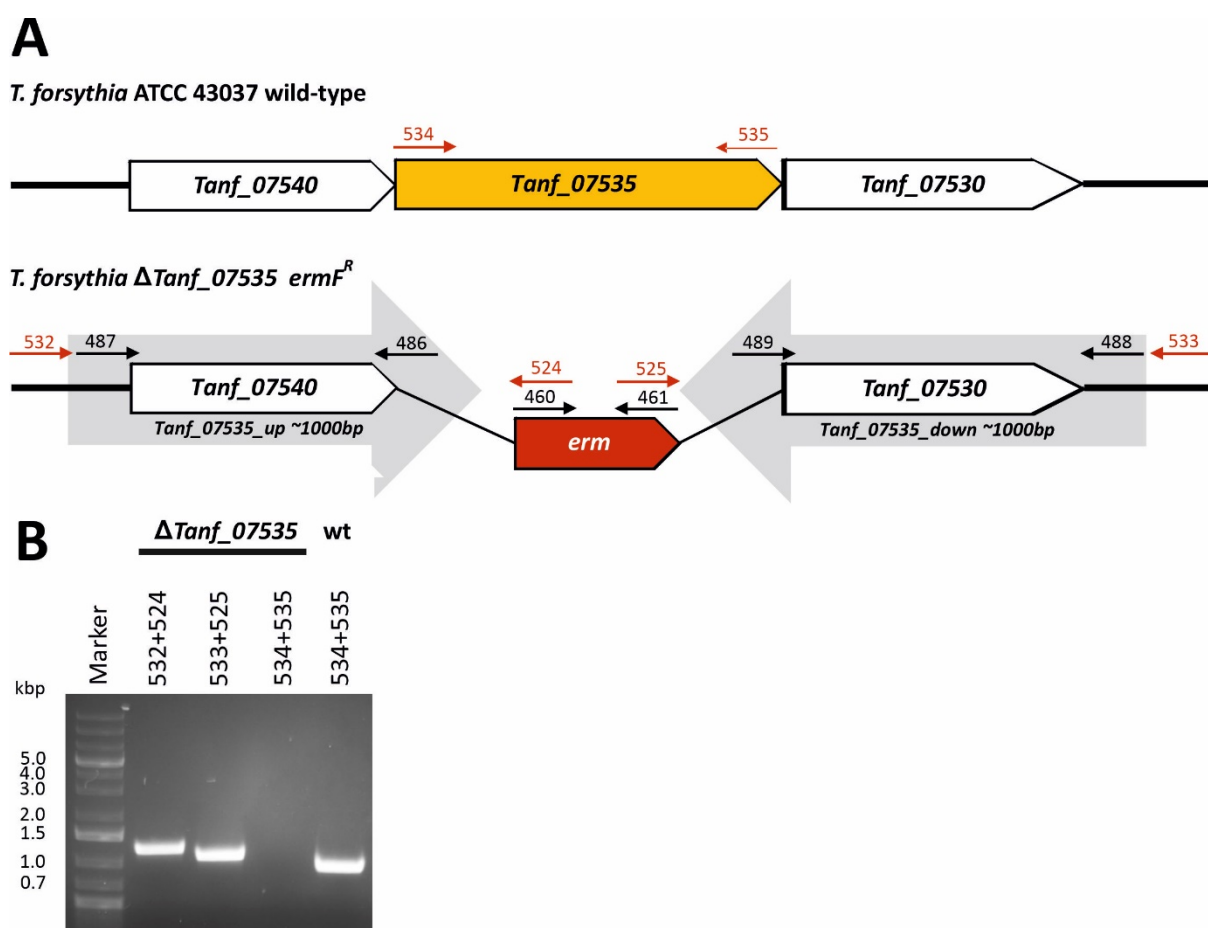

**Figure S2.** Strategy for the generation of a *T. forsythia* ATCC 43037 *fcl* deficient mutant and confirmation by PCR. **(A)** The genomic organization of the *Tanf\_07535* locus is shown for the parent strain *T. forsythia* ATCC 43037 and the  $\Delta Tanf\_07535$  mutant. Black coloured arrows represent primers used for PCR amplification of genes and homologous regions, red coloured primers represent those used to screen for correct integration of the knock-out (not drawn to scale). **(B)** Agarose gel electrophoresis confirms the deletion of *Tanf\_07535* using the up-stream primers 532/524 (1212 bp) and down-stream primers 525/533 (1085 bp) from genomic DNA of *T. forsythia* ATCC 43037  $\Delta Tanf\_07535$  mutant with integrated *erm*. Primers 534/535 yield in a 7898-bp PCR fragment when using *T. forsythia* wild-type genomic DNA, whereas this fragment is absent from genomic DNA of the  $\Delta Tanf\_07535$  mutant confirming the loss of the gene (log); O'Gene Ruler 1 kb Plus DNA Ladder (Thermo Fisher Scientific) was used as a gene ladder.

**MBP-Tanf\_01305 chimera**

MKTEEGKLVIWINGDKGYNGLAEVGKKFEKDTGIKVTVEHPDKLEEKFPQVAATGDGPDIIFW  
 AHDRFGGYAQSGLLAEITPDKAFQDKLYPFTWDAVRYNGKLIAYPIAVEALSIIYNKDLLPNPP  
 KTWEIIPALDKELKAKGKSALMFNLQEPYFTWPLIAADGGYAFKYENGKYDIKDVGVNDAGA  
 KAGLTFLVDLIKNKHMNADTDYSIAEAAFNKGETAMTINGPWAWSNIDTSKVNYGVTVLPTFK  
 GQPSKPFVGVLSAGINAASPNKELAKEFLENYLLTDEGLEAVNKDKPLGAVALKSYEEELAKDP  
 RIAATMENAQKGEIMPNIQMSAFWYAVRTAVINAASGRQTVDEALKDAQTNSSSNNNNNN  
 NNNNLGDDDDKVPEFMSPLFSIITVTYNAEKVLERTLRVSAEQSYARIEYIVIDGASTDGTMEIVT  
 SYKSQSPGLVRFEVISEPDKGLYDAMNKGRLVATGDYVWFLNAGDTLQSPETVARLTEVAERN  
 GMPDILYGETDVVDEQGKFLAARRLKAPEHLTWKSFCTGMLVCHQAFVMKREAAPEYDLQYR  
 FSADFDWCIRCMKQSTAIVNSHLRILHYLAEGMTTRNRKASLKERYRIMCNYYGTFPTRIRHLW  
 FALRFYWAKLFGNNY

**MBP-BF4306 chimera**

MKTEEGKLVIWINGDKGYNGLAEVGKKFEKDTGIKVTVEHPDKLEEKFPQVAATGDGPDIIFW  
 AHDRFGGYAQSGLLAEITPDKAFQDKLYPFTWDAVRYNGKLIAYPIAVEALSIIYNKDLLPNPP  
 KTWEIIPALDKELKAKGKSALMFNLQEPYFTWPLIAADGGYAFKYENGKYDIKDVGVNDAGA  
 KAGLTFLVDLIKNKHMNADTDYSIAEAAFNKGETAMTINGPWAWSNIDTSKVNYGVTVLPTFK  
 GQPSKPFVGVLSAGINAASPNKELAKEFLENYLLTDEGLEAVNKDKPLGAVALKSYEEELAKDP  
 RIAATMENAQKGEIMPNIQMSAFWYAVRTAVINAASGRQTVDEALKDAQTNSSSNNNNNN  
 NNNNLGDDDDKVPEFMHSHSPSPKFSVITVTYNAEKVLEDTVQSVISQTYHHVEYIIIDGASKDG  
 TLEIVNRYRNRINQLVSEPDKGLYDAMNKGIALATGDYLCFLNAGDSFHEDDTLQKMHVSING  
 NELPDILYGETALVDAERHFLMRRLSAPETLNWKSFKQGMLVCHQAFFPRHTLIEPYDLQYRF  
 SADFDWCIHIMKKARTFHNTHLILIDYLAEGMTTQNHKASLLERFRIMTRHYGLLSTLAHHAW  
 FVVRSFSRNSATPSDAPF

**MBP-Phep\_4048 chimera**

MKTEEGKLVIWINGDKGYNGLAEVGKKFEKDTGIKVTVEHPDKLEEKFPQVAATGDGPDIIFW  
 AHDRFGGYAQSGLLAEITPDKAFQDKLYPFTWDAVRYNGKLIAYPIAVEALSIIYNKDLLPNPP  
 KTWEIIPALDKELKAKGKSALMFNLQEPYFTWPLIAADGGYAFKYENGKYDIKDVGVNDAGA  
 KAGLTFLVDLIKNKHMNADTDYSIAEAAFNKGETAMTINGPWAWSNIDTSKVNYGVTVLPTFK  
 GQPSKPFVGVLSAGINAASPNKELAKEFLENYLLTDEGLEAVNKDKPLGAVALKSYEEELAKDP  
 RIAATMENAQKGEIMPNIQMSAFWYAVRTAVINAASGRQTVDEALKDAQTNSSSNNNNNN  
 NNNNLGDDDDKVPEFMTAAKPTLSVITVVYNNVKDIERTMLSVLNQTYPNIEYLLIDGGSTDGT  
 KDIIYKYKSRLAQFISEPDKGIYDAMNKGALATGNYVLFMNSGDELYASDTVAEVFDTASSADI  
 YYGETEMYNEKWESLGQRRHCSPENFNWKSFRYGMSSHQAIYVKRSLAAPFDLRYKYSADID  
 WIIKAAKKASSIVNTHMYVAKYLVGGMSKKKHLASLKERFRIFTKYGLVPNLINHIFISFNLVQ  
 YYFRHGKTND

**Figure S3.** Amino acid sequences of rFucT-MBP chimera used in this study. Sequences are color-coded as follows: MBP (maltose binding protein) (green); linker sequence (blue); rFucT.

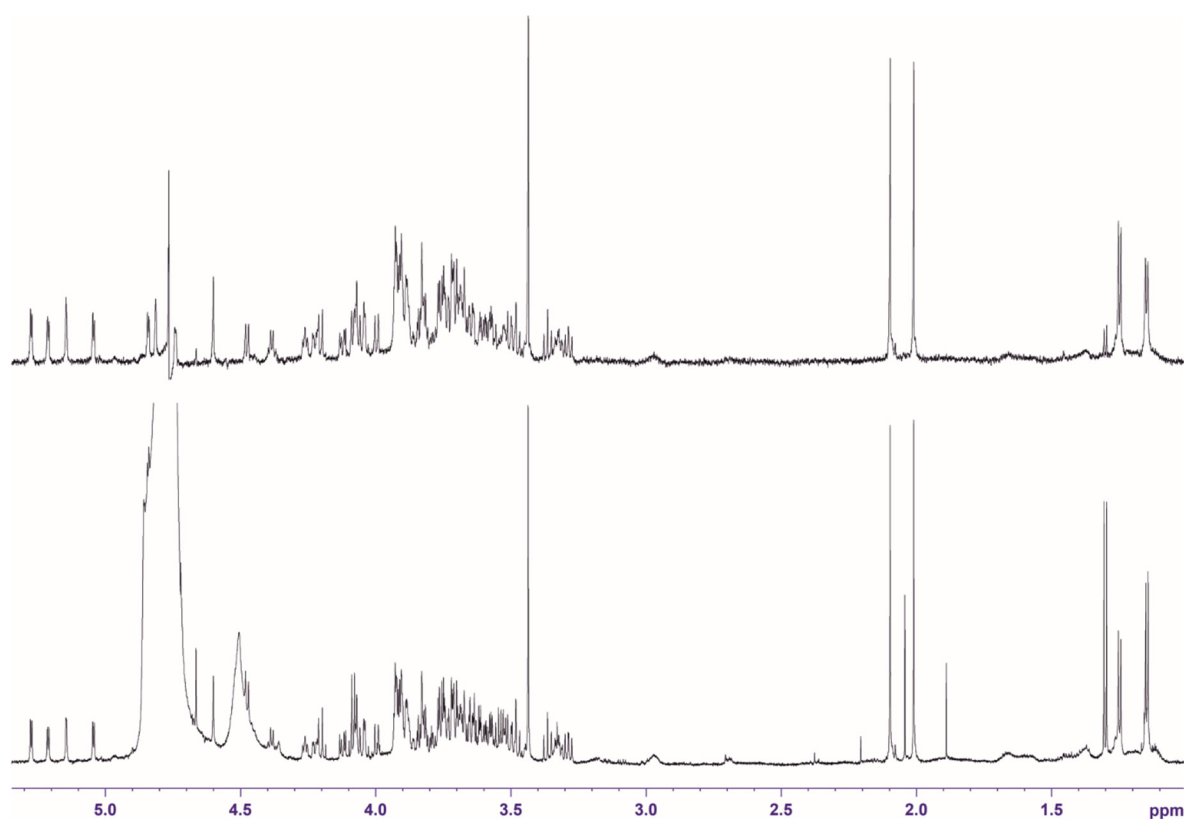

**Figure S4.** <sup>1</sup>H NMR spectra of the *B. fragilis* O-glycan released from glycopeptides by reductive  $\beta$ -elimination. The bottom trace shows the conventional <sup>1</sup>H NMR, whereas in the top trace the residual solvent signal HDO at 4.7 ppm was reduced significantly by applying a 100 ms diffusion filter.

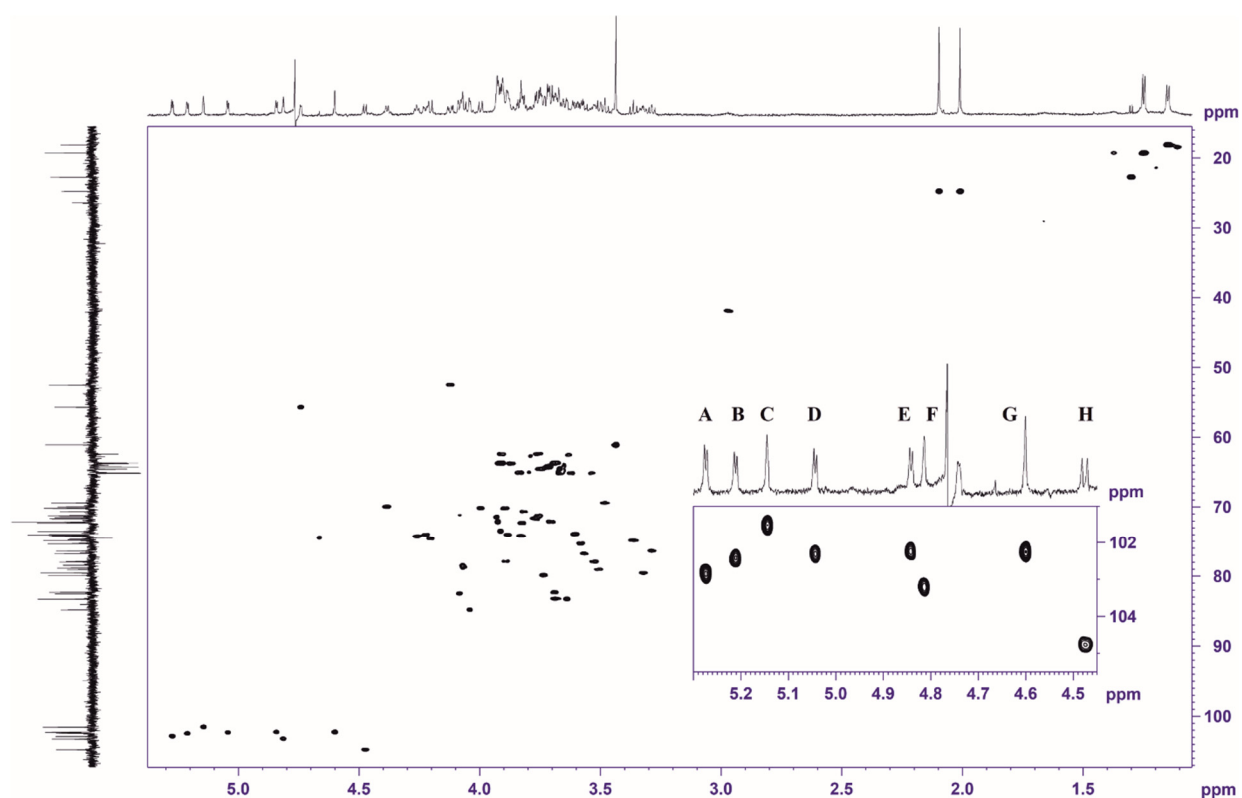

**Figure S5.** 2D-HSQC spectrum of the *B. fragilis* O-glycan released from glycopeptides by reductive  $\beta$ -elimination correlating the carbon signals (left projection) with the directly attached protons (top projection) over one bond. The insert shows the expanded region for the anomeric cross-peaks. The sugar units **A–H** are denoted on the corresponding  $^1\text{H}$  NMR signals in the top trace.



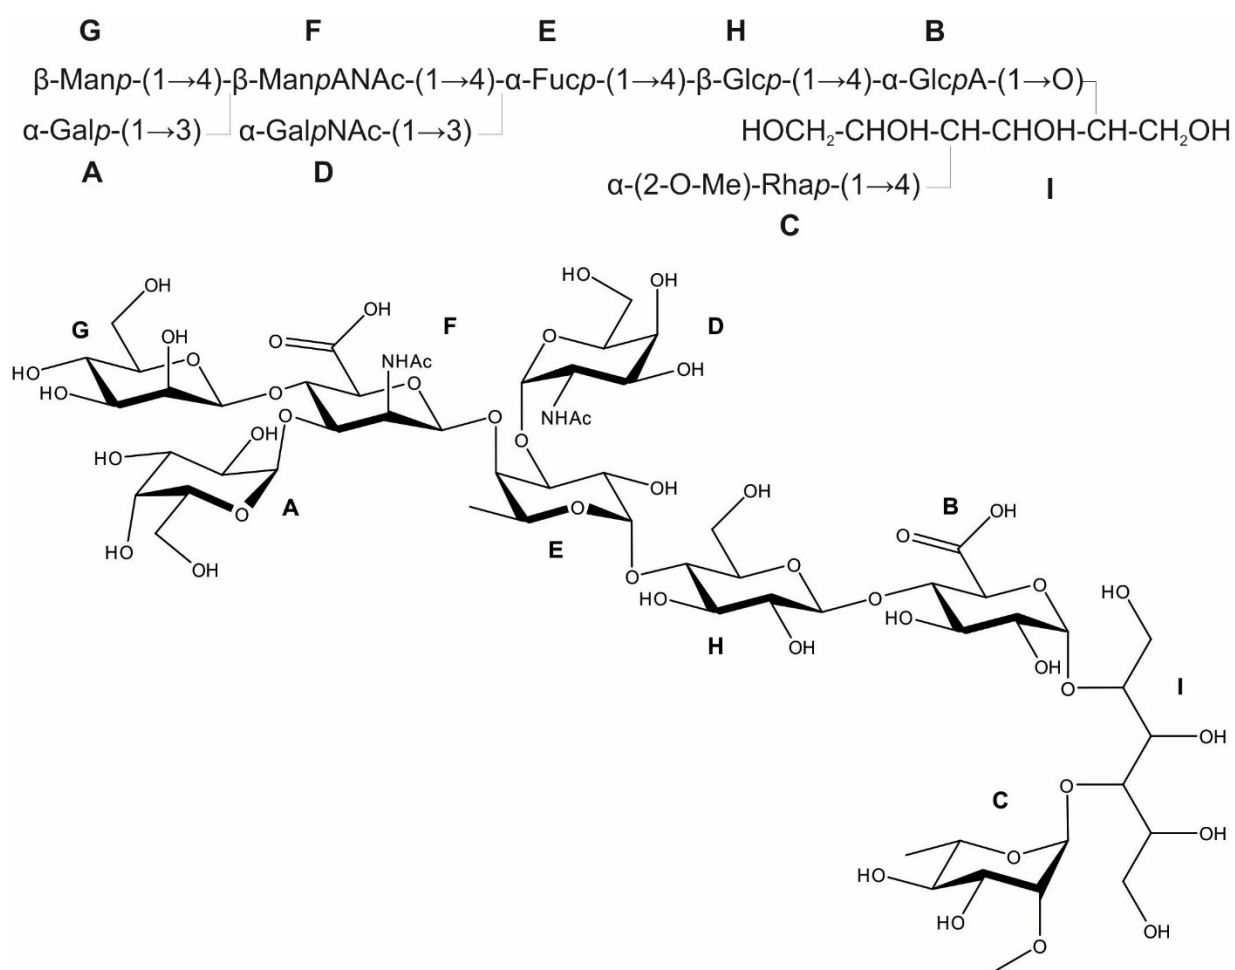

**Figure S6.** Structure elucidated by 700 MHz NMR spectroscopy of the *B. fragilis* wild-type nonasaccharide obtained after reductive  $\beta$ -elimination. While the biochemical data are in full support of the presence of L-fucose, the absolute configuration of the rhamnose unit **C** remains to be firmly established and has only been tentatively assigned to L-configuration.

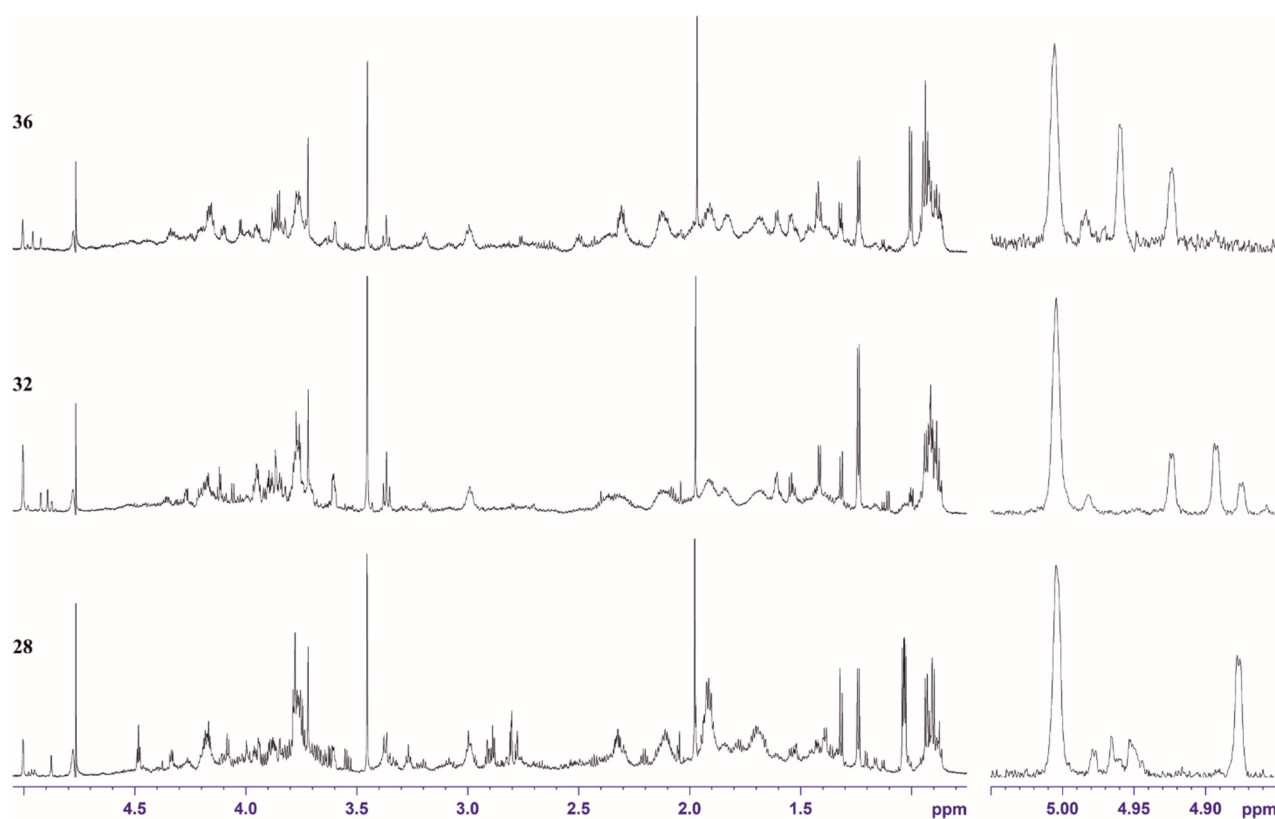

**Figure S7.** <sup>1</sup>H NMR spectra () of three glycopeptides derived from a *B. fragilis*  $\Delta$ BF4306 mutant. The bottom trace is the spectrum from preparation f28, the middle trace from f32, and the top trace from f36. The residual solvent signal HDO (at 4.7 ppm) was suppressed by using presaturation for 3 s. The expansions on the right side show the anomeric regions. Preparation f28 was used for further NMR investigations as essentially only two intense anomeric signals for the disaccharide peptide show up. Preparations f32 and f36 show more signals due to heterogeneity in the peptide part.

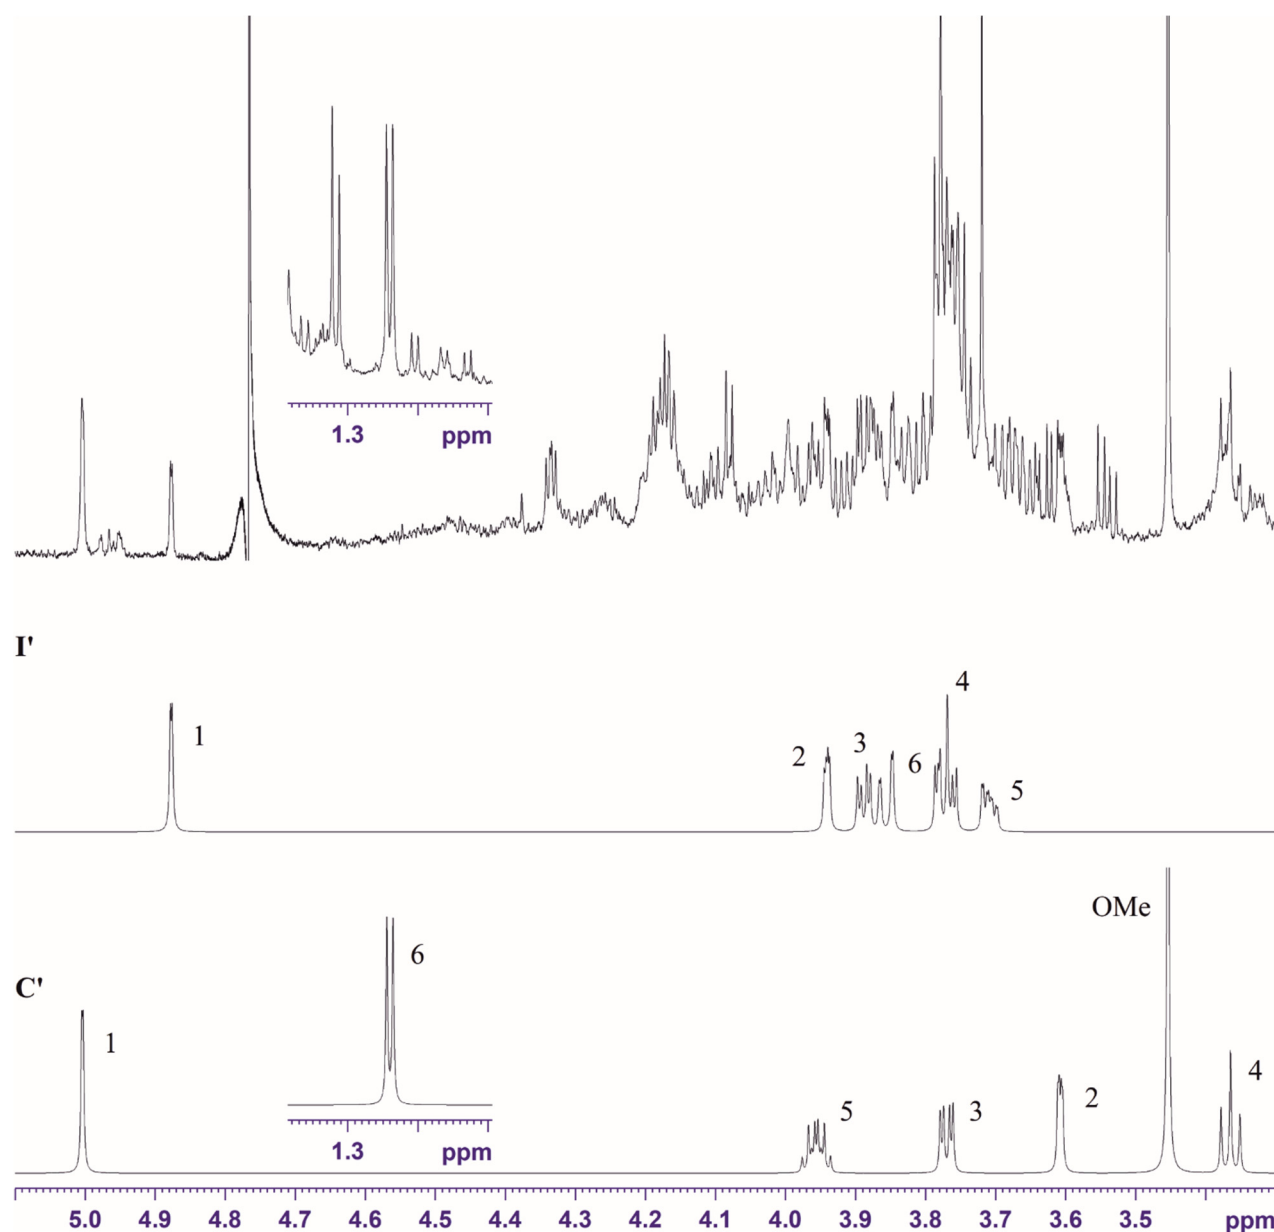

**Figure S8.** Simulated and experimental  $^1\text{H}$  NMR spectra from the *B. fragilis*  $\Delta\text{BF4306}$  glycopeptide f28. The top trace shows the experimental spectrum with an expansion as insert for the aliphatic methyl region. Below are two traces with the simulated spin systems of the two sugar units **C'** and **I'**, the assignment of the individual protons is denoted at the corresponding signals. Trace **C'** shows an expansion as insert showing the methyl group of the Rha.

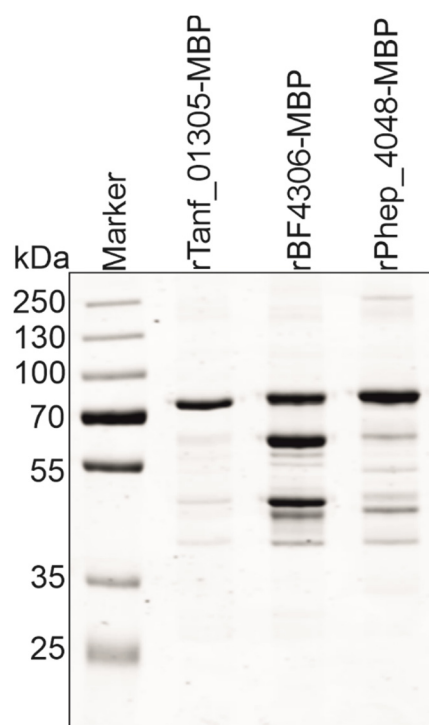

**Figure S9.** SDS-PAGE analysis of purified FucTs used in this study. Recombinantly expressed MBP chimera (rTanf\_01305-MBP; calculated molecular weight: 72.5 kDa; rBF4306-MBP; calculated molecular weight: 72.7 kDa; rPhep\_4048-MBP, calculated molecular weight: 72.0 kDa) were purified via an amylose resin (GE Healthcare; running buffer: 20 mM Tris-HCl pH 7.5, 200 mM NaCl; elution buffer: 20 mM Tris-HCl, pH 7.5, 200 mM NaCl, 10 mM maltose). 10 µg of recombinant enzyme was loaded per lane. Proteins were stained with CBB after separation on a 7.5% SDS-PA gel. PageRuler Plus Prestained Protein Ladder (Thermo Fisher Scientific) was used as a protein molecular weight marker.

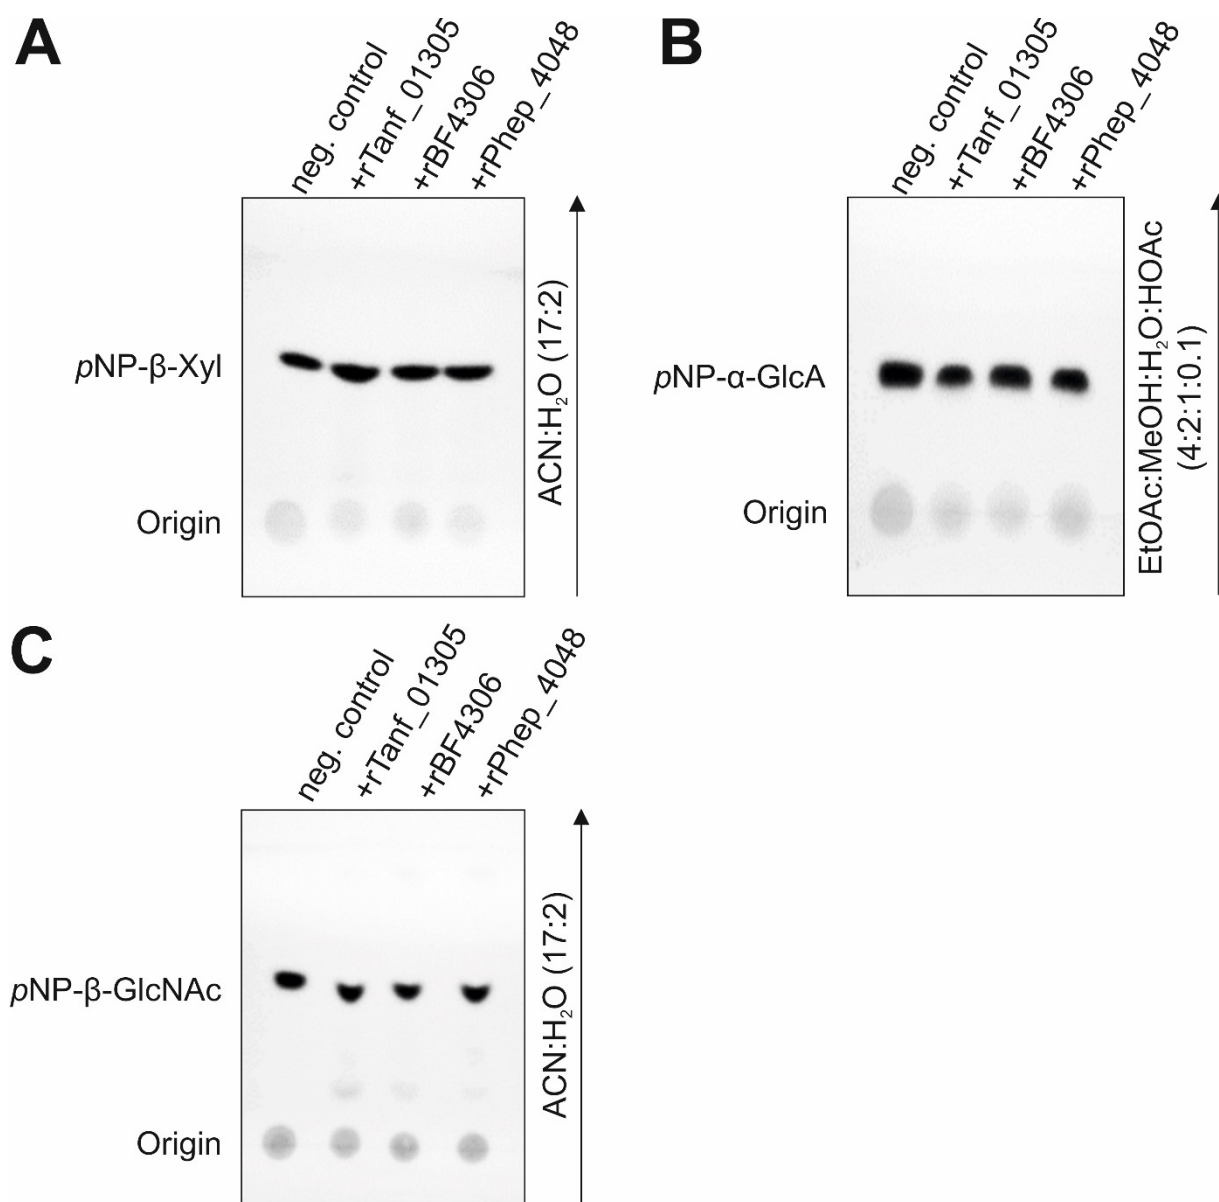

**Figure S10.** In vitro fucosyltransferase activity assays with other *pNP*-sugar substrates. Developed TLC plates show no formation of (A) *pNP*-α-D-Xyl-Fuc, (B) *pNP*-α-D-GlcA-Fuc or (C) *pNP*-β-D-GlcNAc-Fuc when using recombinant FucT from *T. forsythia* (rTanf\_01305), *B. fragilis* (rBF4306) and *P. heparinus* (rPhep\_4048), respectively.

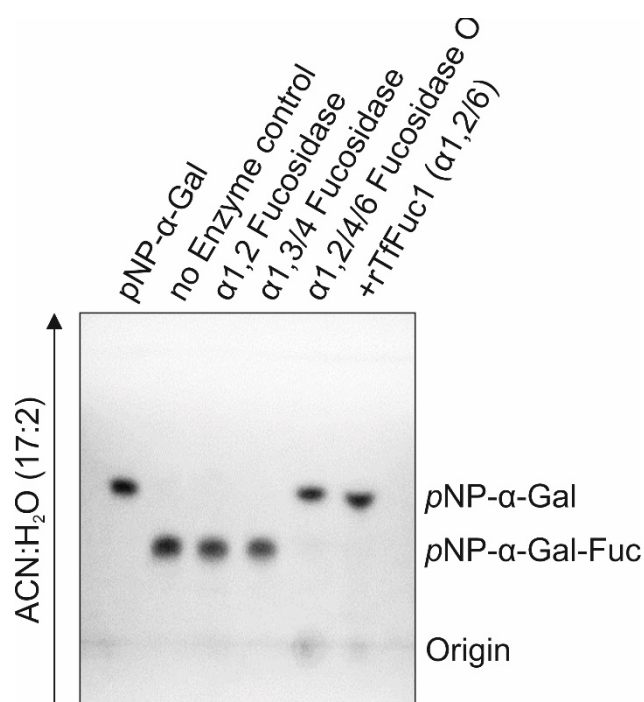

**Figure S11.** Fucosidase treatment of *pNP-Gal-Fuc* generated through Tanf\_01305 activity on *pNP-Gal*. Commercially available fucosidases  $\alpha$ 1,2 fucosidase,  $\alpha$ 1,3/4 fucosidase and  $\alpha$ 1,2/4/6 fucosidase O as well as *T. forsythia* fucosidase rTfFuc1 were tested for their ability to cleave Fuc from *pNP-α-Gal-Fuc*. Reactions were analysed by TLC on silica gel 60 F<sub>254</sub> plates. Fucosidase O and rTfFuc1 were active on *pNP-α-Gal-Fuc*.
